# Supplementary material
Source: PubMed Central journal article supplement (PMC4966696)
Supplement: jm6b00342_si_001.pdf [file jm6b00342_si_001.pdf]

# Supporting Information

## Impact of stepwise NH<sub>2</sub>-methylation of Triapine on the physico-chemical properties, anticancer activity and resistance circumvention

*Christian R. Kowol,<sup>‡,§,‡,\*</sup> Walter Miklos,<sup>#,‡</sup> Sarah Pfaff,<sup>‡</sup> Sonja Hager,<sup>#</sup> Sebastian Kallus,<sup>‡</sup> Karla Pelivan,<sup>‡</sup> Mario Kubanik,<sup>‡</sup> Éva A. Enyedy,<sup>†</sup> Walter Berger,<sup>#,§</sup> Petra Heffeter,<sup>#,§,\*</sup> Bernhard K. Keppler<sup>‡,§</sup>*

### Table of contents

|                                                                       | <b>page number</b> |
|-----------------------------------------------------------------------|--------------------|
| Combination indices values for cytotoxicity in the presence of Cu(II) | <b>S2</b>          |
| Impact of Cu(II) ions on the activity of Dp44mT                       | <b>S3</b>          |

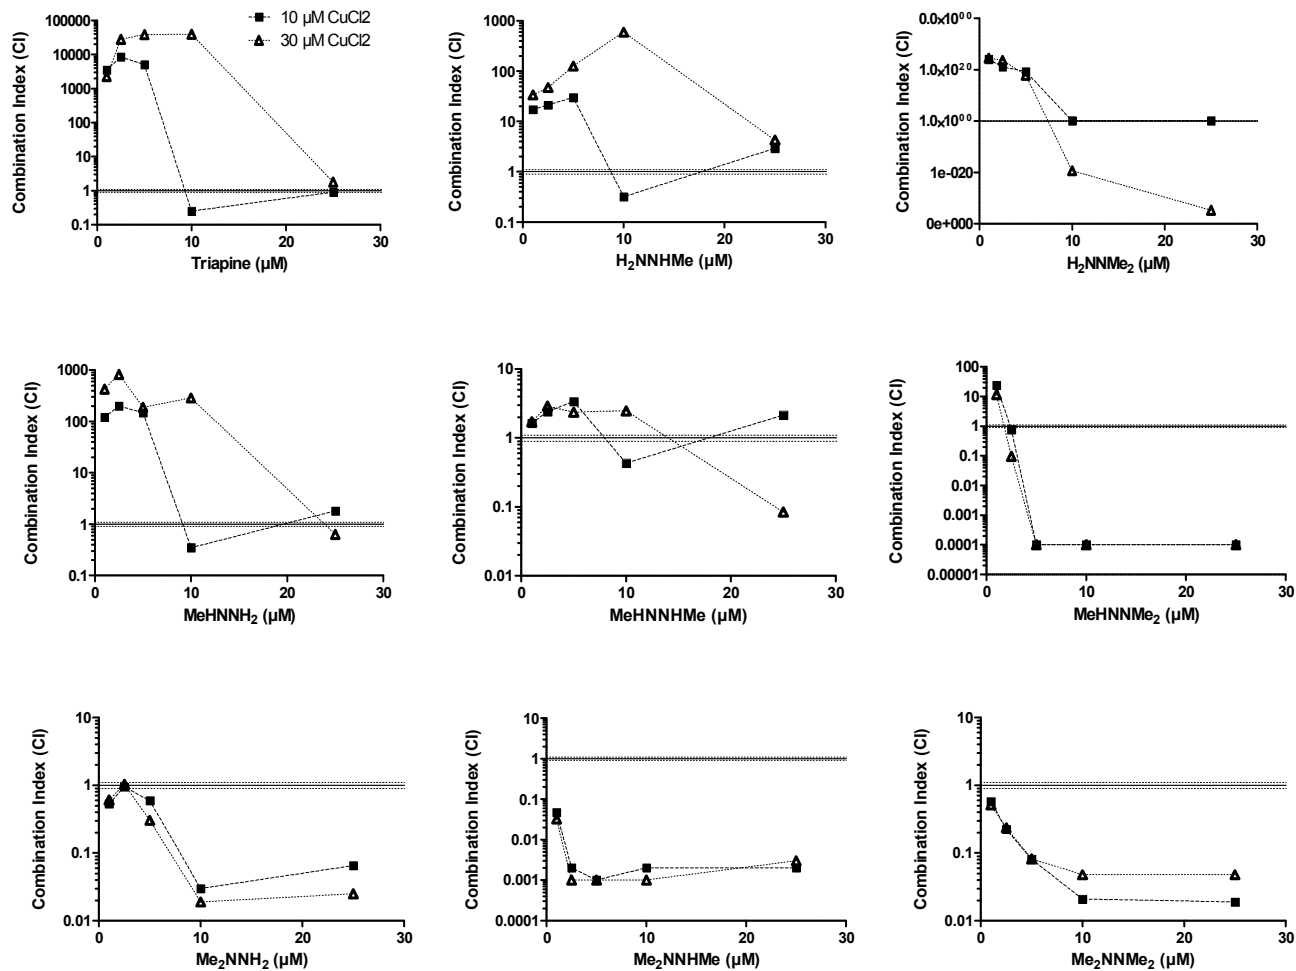

Figure S1. Impact of structural modifications of Triapine on the cytotoxicity in the presence of Cu(II) ions. Briefly, after 60 min pre-incubation with CuCl<sub>2</sub> (10 and 30 μM), SW480 cells were treated for 72 h with the indicated concentrations of Triapine and its derivatives. Viability was determined using MTT assay. The values given are combination indices (CI values) calculated by CalcuSyn software. CI < 0.9, CI = 0.9–1.2 or CI > 1.2 represent synergism, additive effects and antagonism, respectively.

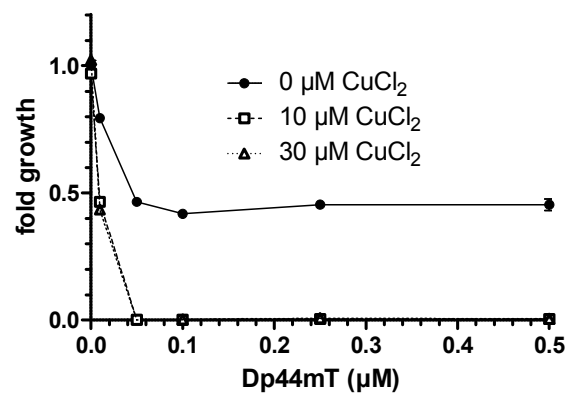

Figure S2. Impact of Cu(II) ions on the activity of Dp44mT. Briefly, after 60 min pre-incubation with CuCl<sub>2</sub> (10 and 30 μM), SW480 cells were treated for 72 h with the indicated concentrations of the drug. Viability was determined using MTT assay. The values given are the mean ± the standard deviation of triplicates from one representative experiment out of three.
